# Supplementary material
Source: PubMed Central journal article supplement (PMC7722058)
Supplement: NIHMS1630050-supplement-sup_FigS2.pdf [file NIHMS1630050-supplement-sup_FigS2.pdf]

# NSD2 is a histone methyltransferase

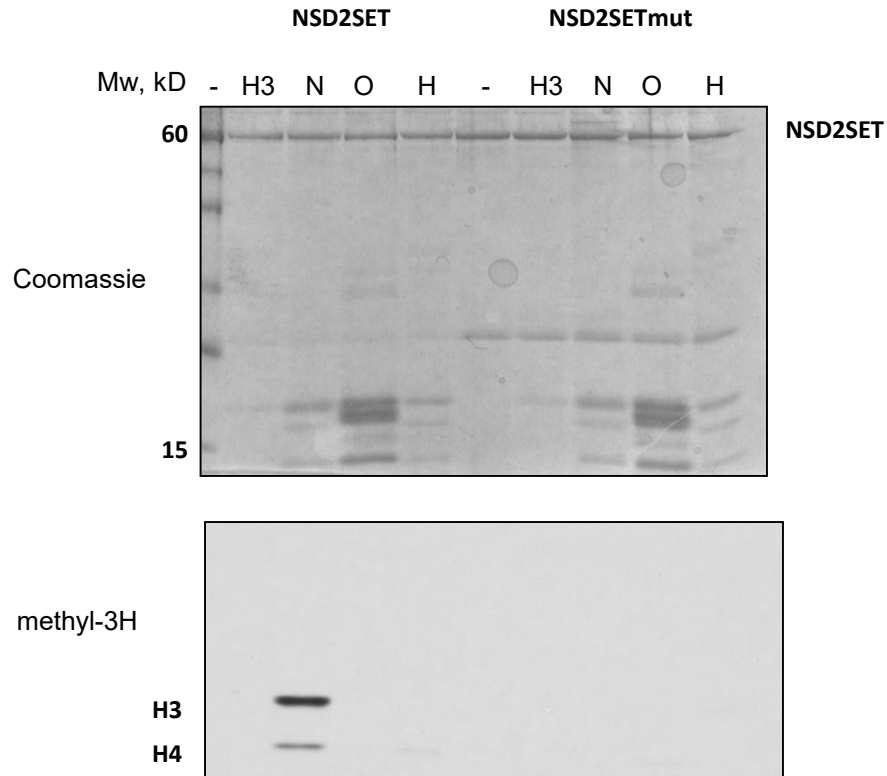

H3 – histone H3  
N - Nucleosomes  
O – Octamer of histones  
H – mixed histones, not assembled into nucleosomes
